# Supplementary material
Source: PubMed Central journal article supplement (PMC3575863)
Supplement: pro0022-0083-SD1.pdf [file pro0022-0083-SD1.pdf]

## Structural insight into the separate roles of IP4 and DAD in activation of histone deacetylase 3

Mehrnoosh Arrar\*<sup>1</sup>, Rigney Turnham<sup>2</sup>, Levi Pierce<sup>1</sup>, Cesar Augusto F. de Oliveira<sup>3</sup>, and J. Andrew McCammon<sup>1,3</sup>

<sup>1</sup>Department of Chemistry and Biochemistry, University of California San Diego, La Jolla, CA 92093-0365

<sup>2</sup>Department of Chemistry and Biochemistry, New Mexico State University, Las Cruces, NM 88003-3335

<sup>3</sup>Howard Hughes Medical Institute, Department of Pharmacology, University of California San Diego, La Jolla, CA 92093-0365

### Supplementary Information

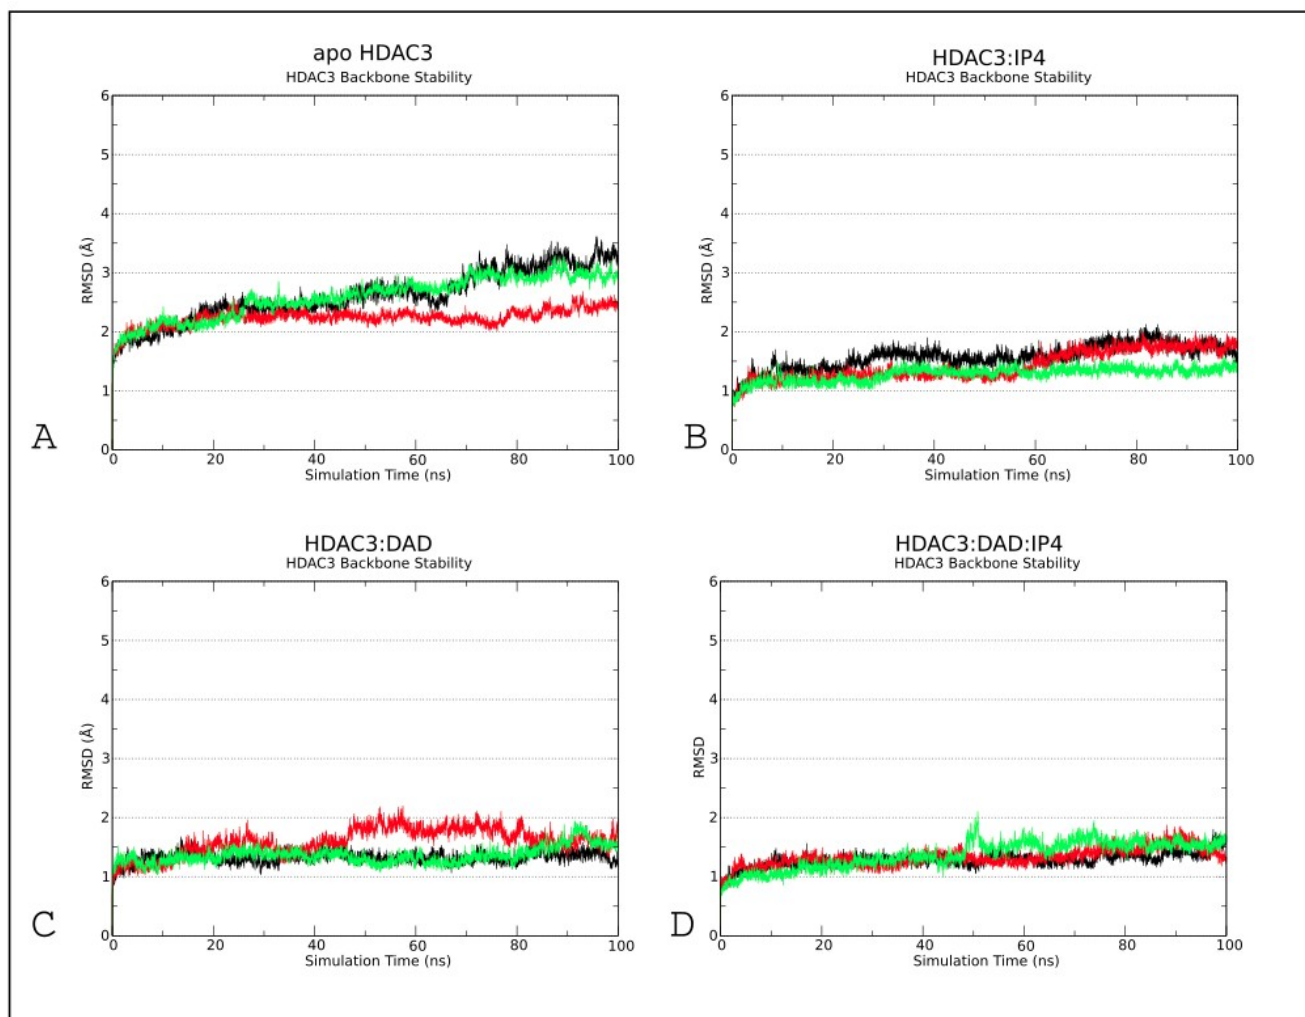

**SI Figure 1:** Root mean square deviations ( $\text{\AA}$ ) from initial frames for MD simulations of (A) apo HDAC3, (B) HDAC3:IP4, (C) HDAC3:DAD, and (D) HDAC3:DAD:IP4. Initial frames were different snapshots from pre-production MD (once density of water box equilibrated). Three colors represent independent trials. For each trajectory, all protein backbone atoms were first aligned to its initial coordinates, and RMSD of HDAC3 backbone is plotted during the course of 100ns.

### Clustering Details for apo HDAC3 structural ensemble:

Clustering was done within Ptraj within the AmberTools package. Hierarchical, average linkage, and centroid linkage algorithms were tested. Since each algorithm requires the number of clusters to be chosen by the user, we also tested various cluster sizes (3, 4, 5) and the different algorithms on a subset of apo HDAC3 trajectories. Visual inspection of clusters as well as consideration of three different clustering metrics (DBI, pSF, and SSR/SST) were used to choose the algorithm and number of clusters, as suggested in Ref 17.

|                                                |              |
|------------------------------------------------|--------------|
| Desired Clusters                               | 4            |
| Clustering Algorithm                           | Hierarchical |
| Distance Metric                                | RMS          |
| Davies-Bouldin Index                           | 2.8148       |
| Pseudo F-statistic                             | 35311.18359  |
| Sum of squares regression/Total sum of squares | 0.91378      |

**SI Table I:** Details of clustering analysis and clustering metrics for apo HDAC3 structural ensemble.

|          | Average distance to centroid (Å) | No. of structures | Occurence | Backbone RMSD from pdb 4A69 (Å) |
|----------|----------------------------------|-------------------|-----------|---------------------------------|
| Cluster0 | 0.714325                         | 2042              | 0.204     | 1.277                           |
| Cluster1 | 0.753151                         | 3910              | 0.391     | 2.246                           |
| Cluster2 | 0.734884                         | 1376              | 0.138     | 1.175                           |
| Cluster3 | 0.742089                         | 2672              | 0.267     | 1.880                           |

**SI Table II:** Summary of four apo HDAC3 clusters. 10,000 total structures from a total of 300ns simulations (three independent 100ns trajectories) were used.

### Cross comparison of structural ensembles

Using a RMSD cutoff of 1.4 Å between the apo structures and each of the cluster representatives, we were able to assign the same cluster occupancies for the apo trajectory as the clustering algorithm (+/- 5%). We then used the same cutoff to classify resemblance between structures from the different ensembles and the apo cluster representatives.

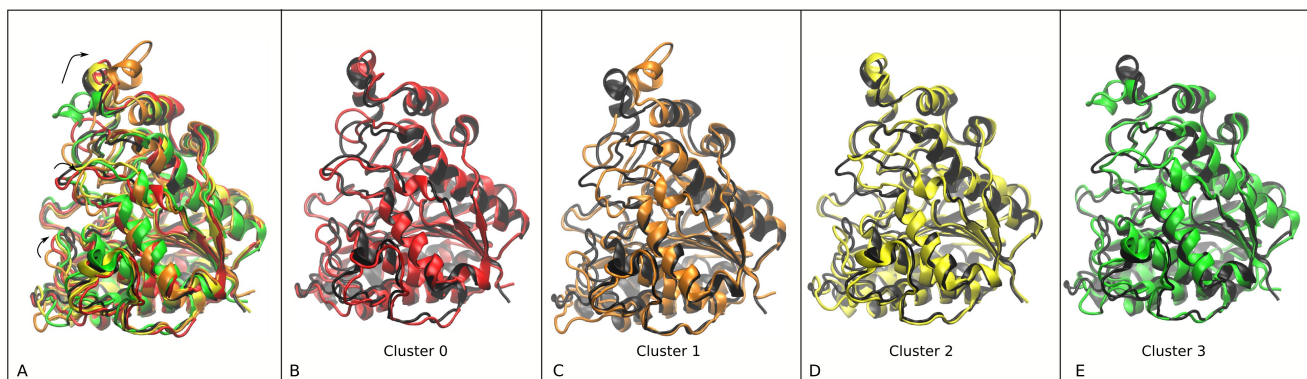

**SI Figure 2:** Representatives from clustering analysis of apo HDAC3 simulations. (A) All four cluster representatives are superimposed on the crystal structure of HDAC3. Arrows indicate distinguishing motifs among the clusters; (B) Cluster 0 representative in red; (C) Cluster 1 representative in orange; (D) Cluster 2 representative in yellow; (E) Cluster 3 representative in green.

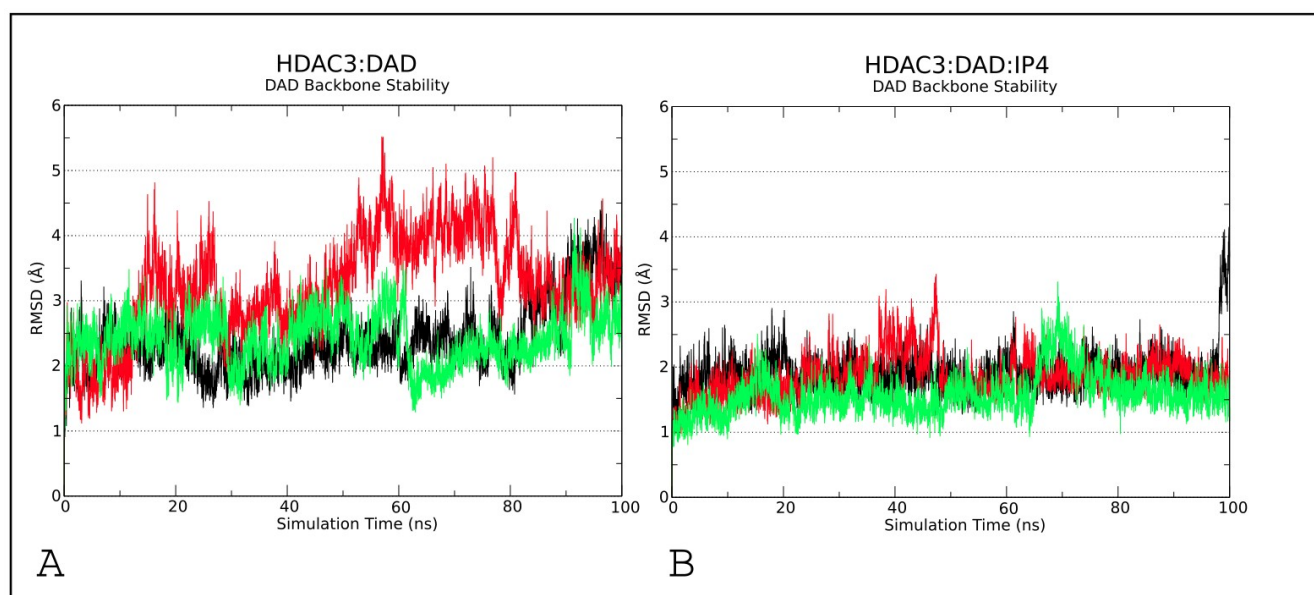

**SI Figure 3:** RMSD ( $\text{\AA}$ ) of DAD backbone atoms during MD simulations of (A) HDAC3:DAD, and (B) HDAC3:DAD:IP4 complexes. For each trajectory the entire protein backbone was aligned to its initial coordinates and then the RMSD was measured for just the DAD backbone during the 100ns simulations. Different colors represent three independent simulations.

**Model Parameters:**

| Bonds | $k_r$ (kcal/mol/Å <sup>2</sup> ) | $r_0$ (Å) |
|-------|----------------------------------|-----------|
| O2-Zn | 120                              | 1.92      |
| NB-Zn | 240                              | 2.00      |

**SI Table III:** Parameters for bonds to zinc center in active site. Atoms are labeled according to their AMBER atom type (O2: carboxylic acid oxygen on ASP; NB is imidazole nitrogen on HIS).

| Angles   | $k_\theta$ (kcal/mol/rad <sup>2</sup> ) | $\theta$ (rad) |
|----------|-----------------------------------------|----------------|
| O2-Zn-NB | 50                                      | 105.00         |
| O2-Zn-O2 | 50                                      | 105.00         |
| C-O2-Zn  | 80                                      | 125.00         |
| CR-NB-Zn | 80                                      | 119.00         |
| CC-NB-Zn | 80                                      | 131.00         |

**SI Table IV:** Parameters for angles involving zinc center in active site. Atoms are labeled according to their AMBER atom names.

| Atom name  | Modified Charge | Atom name  | Modified Charge |
|------------|-----------------|------------|-----------------|
| Zn         | 1.24            |            |                 |
| <b>ASP</b> |                 | <b>HIS</b> |                 |
| N          | -0.5163         | N          | -0.4157         |
| H          | 0.2936          | H          | 0.2719          |
| CA         | 0.0381          | CA         | -0.0581         |
| HA         | 0.0880          | HA         | 0.1360          |
| CB         | -0.4267         | CB         | -0.4934         |
| HB2        | 0.0676          | HB2        | 0.0961          |
| HB3        | 0.0676          | HB3        | 0.0961          |
| CG         | 0.9542          | CG         | 0.2789          |
| OD1        | -0.7929         | ND1        | -0.3216         |
| OD2        | -0.7929         | CE1        | -0.0216         |
| C          | 0.5366          | HE1        | 0.2449          |
| O          | -0.5819         | NE2        | -0.1949         |
|            |                 | HE2        | 0.3406          |
|            |                 | CD2        | -0.3169         |
|            |                 | HD2        | 0.2226          |
|            |                 | C          | 0.5973          |
|            |                 | O          | -0.5679         |

**SI Table IV:** Parameters for angles involving zinc center in active site. Atoms are labeled according to their AMBER atom type.

### Assignment of protonation states

Neutral histidine residues were simulated with either the N<sub>ε</sub> or N<sub>δ</sub> imidazole nitrogen protonated (HIE or HID, respectively) depending on local environments. Propka and the local environments were used to simulate certain histidines in the charged +1 state (HIP).

| Residue number (pdb: 4a69) | Histidine protonation state |
|----------------------------|-----------------------------|
| 16                         | HIE                         |
| 21                         | HIE                         |
| 26                         | HID                         |
| 32                         | HIE                         |
| 37                         | HIE                         |
| 55                         | HIE                         |
| 61                         | HID                         |
| 133                        | HIP                         |
| 134                        | HID                         |
| 160                        | HIE                         |
| 172                        | HIE                         |
| 192                        | HIE                         |
| 233                        | HIE                         |
| 275                        | HIP                         |
| 338                        | HIE                         |

*SI Table V: Summary of assigned protonation states for histidine residues*
